# Supplementary material
Source: HighWire-hosted journal article supplement (https://err.ersjournals.com/content/27/149/170135)
Supplement: inline-supplementary-material-1 [file inline-supplementary-material-1.pdf]

## Supplementary appendix

### Index:

- Supplementary table 1: Extensive description of case reports/series and clinical trials of humans with a surfactant-processing mutation involved in fibrotic IP
- Reference list supplementary table 1
- Search strategy in Pubmed and Embase

### Supplementary table 1

Extensive description of case reports/series and clinical trials of humans with a surfactant-processing mutation involved in fibrotic IP

| Gene mutation                 | Diagnosis                                      | Drug                              | Outcome after treatment                                   | Ref |
|-------------------------------|------------------------------------------------|-----------------------------------|-----------------------------------------------------------|-----|
| Adult case reports and series |                                                |                                   |                                                           |     |
| <i>SFTPC</i> p.I73T           | Adult with CPFE                                | Prednisone                        | No improvement, pulmonary function test and HRCT worsened | (1) |
| <i>SFTPA2</i> p.G231V         | 1 Adult with HP                                | Prednisone and avoidance of birds | Remission of disease                                      | (2) |
|                               | 1 Adult with PF and broncho-alveolar carcinoma | Prednisone                        | No improvement                                            |     |
| <i>ABCA3</i> p.G964D          | Adult with PF                                  | Antibiotics                       | Ineffective                                               | (3) |
|                               |                                                | Prednisone and azithromycin       | Minimal progression of lung function impairment. HRCT     |     |

|                           |                                                  |                                   |                                                                                                                                                                                                                                                           |     |
|---------------------------|--------------------------------------------------|-----------------------------------|-----------------------------------------------------------------------------------------------------------------------------------------------------------------------------------------------------------------------------------------------------------|-----|
|                           |                                                  |                                   | scan: disappearance of ground-glass areas with persistence of fibrosis                                                                                                                                                                                    |     |
| <i>ABCA3</i><br>p.G964D   | Adult with restrictive lung disease <sup>#</sup> | Steroids and azithromycin         | Moderate improvement, transient, sick-same after 5 years                                                                                                                                                                                                  | (4) |
| <i>HPS*</i>               | Adult with HPS                                   | Antibiotics and oxygen inhalation | Not effective, lung function deteriorated, patient died                                                                                                                                                                                                   | (5) |
| <i>HPS1</i> IVS5+5<br>G>A | Adult with HPS                                   | Prednisolone, cyclosporine A      | Vital capacity decreased and the areas of lung opacity deteriorated                                                                                                                                                                                       | (6) |
|                           |                                                  | + Pirfenidone                     | Respiratory symptoms stabilized and serum KL-6 level decreased for a few months, later progression, increase in areas of diffuse lung opacity and gradual decrease of lung volume. Oxygen therapy was administered, died of an acute exacerbation.        |     |
| <i>HPS4</i><br>p.Q620X    | Adult with HPS                                   | Corticosteroids, pirfenidone      | Breathing condition, clinical marker levels and radiological characteristics stabilized. Corticosteroid tapered, later gradual progression of bilateral diffuse ground-glass opacity with mild traction bronchiectasis, condition still considered stable | (7) |

|                                                            |                                                                                                |                                               |                                                                                                                                                         |      |
|------------------------------------------------------------|------------------------------------------------------------------------------------------------|-----------------------------------------------|---------------------------------------------------------------------------------------------------------------------------------------------------------|------|
| <i>HPS1</i><br>p.L668P                                     | Adult with<br>HPS                                                                              | Prednisolone, pirfenidone,<br>azathioprine    | Progressively deterioration of<br>diffuse reticulations, later died                                                                                     | (8)  |
| <i>HPS*</i>                                                | Adult with<br>HPS                                                                              | Oral corticosteroids                          | No symptomatic improvement,<br>died                                                                                                                     | (9)  |
| <i>HPS4</i><br>p.P685delC                                  | Adult with<br>HPS                                                                              | High dose steroids and<br>azathioprine        | No effect; still alive but<br>progressively dyspnoeic                                                                                                   | (10) |
| <i>HPS*</i>                                                | Adult with<br>HPS and<br>pulmonary<br>sarcoidosis                                              | Prednisone                                    | Resolution of dyspnoea                                                                                                                                  | (11) |
| <i>HPS*</i>                                                | Adult with<br>HPS                                                                              | Prednisolone and<br>pirfenidone               | Gradual progression, oxygen<br>therapy initiated                                                                                                        | (12) |
| Paediatric case reports/series with <i>SFTPC</i> mutations |                                                                                                |                                               |                                                                                                                                                         |      |
| <i>SFTPC</i> p.I73T<br>p.I38F, p.V39L                      | 4 Children<br>with DIP , 1<br>child with<br>chronic<br>interstitial<br>pneumonitis<br>(p.V39L) | 1/5 Systemic steroids                         | No improvement                                                                                                                                          | (13) |
|                                                            |                                                                                                | 5/5 Hydroxychloroquine                        | 2 out of 5: improved lung<br>function, later on reduced<br>exercise capacity<br><br>3 out of 5 free of symptoms,<br>improved pulmonary function<br>test |      |
| <i>SFTPC</i><br>p.A116D                                    | Child with<br>NSIP                                                                             | Hydroxychloroquine and<br>supplemental oxygen | Improvement on chest film,<br>weight gain, no longer<br>supplemental oxygen required                                                                    | (14) |
| <i>SFTPC</i> p.I73T                                        | Child with<br>ILD                                                                              | Corticosteroids and<br>supplemental oxygen    | Condition improved                                                                                                                                      | (1)  |

|                                                      |                                                    |                                                                                                                |                                                                                                                                                                                               |      |
|------------------------------------------------------|----------------------------------------------------|----------------------------------------------------------------------------------------------------------------|-----------------------------------------------------------------------------------------------------------------------------------------------------------------------------------------------|------|
| <i>SFTPC</i><br>c.460+1 G →<br>A                     | Child with<br>cellular or<br>NSIP                  | Corticosteroids and<br>supplemental oxygen                                                                     | Respiratory symptoms<br>(tachypnea and cyanosis)<br>improved somewhat                                                                                                                         | (15) |
| <i>SFTPC</i> p.I73T                                  | 5 Children<br>with chronic<br>ILD                  | 5/5 Methylprednisolone,<br>4/5 Hydroxychloroquine,<br>5/5 Supplemental oxygen                                  | Decrease in retractions,<br>oxygen requirement and in<br>breath rate                                                                                                                          | (16) |
| Different<br><i>SFTPC</i><br>BRICHOS/<br>non BRICHOS | 17 Children<br>with<br>ILD##(NSIP<br>PAP, DIP)     | 14/17 Hydroxychloroquine                                                                                       | 12/14 moderate improvement<br>– good response, 2/14 no<br>improvement                                                                                                                         | (17) |
|                                                      |                                                    | 15/17 Systemic steroids                                                                                        | 14/15 moderate improvement<br>– good response, 1/15 no<br>improvement                                                                                                                         |      |
|                                                      |                                                    | 7/17 surfactant                                                                                                | 2 moderate improvement –<br>good response, 5 no<br>improvement                                                                                                                                |      |
|                                                      |                                                    | 3/17 Colchicine                                                                                                | 3 no improvement                                                                                                                                                                              |      |
| <i>SFTPC</i><br>14 non<br>BRICHOS, 6<br>BRICHOS      | 22 Children<br>with chronic<br>ILD at<br>diagnosis | 18/22<br>Methylprednisolone,<br>11/22<br>Hydroxychloroquine, 5/22<br>Azithromycin 20/22<br>Supplemental oxygen | 4 still with oxygen (did not<br>receive HCQ) 16 weaned off<br>oxygen, of which 4 symptom<br>free, 12 with progressive<br>clinical improvement,<br>moderate dyspnoea and<br>exercise tolerance | (18) |
| <i>SFTPC</i><br>p.G97S                               | Child with<br>CPI pattern<br>with globular         | Home ventilator support,<br>oxygen, pulse<br>methylprednisolone,                                               | Resolution of ground glass<br>opacities, thickening of<br>interlobular septa persisted,<br>ventilation support was                                                                            | (19) |

|                                |                                                         |                                                                                                                                                                            |                                                                                                                                                                                                                                                                                                                                                                                                  |      |
|--------------------------------|---------------------------------------------------------|----------------------------------------------------------------------------------------------------------------------------------------------------------------------------|--------------------------------------------------------------------------------------------------------------------------------------------------------------------------------------------------------------------------------------------------------------------------------------------------------------------------------------------------------------------------------------------------|------|
|                                | alveolar<br>proteinosis                                 | azithromycin,<br>hydroxychloroquine                                                                                                                                        | discontinued. Supplemental<br>oxygen requirement remained.                                                                                                                                                                                                                                                                                                                                       |      |
| <i>SFTPC</i><br>p.I73T, p.I38F | 2 Children<br>with CPI                                  | Hydroxychloroquine,<br>prednisone, ranitidine,<br>TMP-SMX, two months<br>after therapy began, pulse<br>therapy of<br>methylprednisolone, later<br>hydroxychloroquine alone | 1: minute ventilation ( $V_E$ )<br>remained high later improved<br>and became normal,<br>respiratory system compliance<br>( $C_{rs}$ ) continued to decline<br>improved after<br>methylprednisolone, 2:<br>improved $V_E$ , . Functional<br>residual capacity declined,<br>later on improved and became<br>normal. $C_{rs}$ continued to<br>decline, later on improved<br>reaching normal values | (20) |
| <i>SFTPC</i> p.I73T            | Child with<br>CPI,<br>pneumatocel<br>es after<br>biopsy | Methylprednisolone,<br>hydroxychloroquine,<br>azithromycin                                                                                                                 | Pneumatocelles resorbed after<br>10 days. Weaned off oxygen,<br>steroid treatment was stopped,<br>radiological improvement                                                                                                                                                                                                                                                                       | (21) |
| <i>SFTPC</i> p.I73T            | Child with<br>ILD                                       | Hydroxychloroquine,<br>oxygen supplementation                                                                                                                              | Improvement of cough and<br>dyspnoea, three months<br>completely asymptomatic,<br>disappearance ground glass<br>abnormalities, six months<br>disappearance micronodules                                                                                                                                                                                                                          | (22) |
|                                | Child with<br>ARDS/DIP                                  | Supplemental oxygen and<br>steroids                                                                                                                                        | No improvement                                                                                                                                                                                                                                                                                                                                                                                   |      |

|              |                         |                                                                                                                                                       |                                                                                                                |      |
|--------------|-------------------------|-------------------------------------------------------------------------------------------------------------------------------------------------------|----------------------------------------------------------------------------------------------------------------|------|
|              |                         | Steroids pulse therapy                                                                                                                                | Initial improvement, but thereafter progression of ILD                                                         |      |
|              |                         | Hydroxychloroquine                                                                                                                                    | Improvement in saturation, discontinuation of oxygen therapy                                                   |      |
|              |                         | Hydroxychloroquine replaced by azithromycin                                                                                                           | Clinically and radiologically stable                                                                           |      |
|              | Child with DIP          | Hydroxychloroquine and steroids                                                                                                                       | No effect, died                                                                                                |      |
| SFTPC p.I73T | Child with chILD        | Bronchodilators, inhaled corticosteroids and antileukotrienes, azathioprine, hydroxychloroquine and intravenous immunoglobulins, exogenous surfactant | No effect                                                                                                      | (23) |
| SFTPC p.I73T | Child with PAP and NSIP | Supplemental oxygen, whole lung lavages, systemic corticosteroids and azathioprine                                                                    | Significant acute improvements of gas exchange with a reduced need for additional oxygen, later reduced effect | (24) |
|              |                         | Additional corticosteroid pulse therapy plus azathioprine                                                                                             | Still oxygen dependent, delay in growth                                                                        |      |

|                                                           |                                                              |                                                                                        |                                                                                                                                          |      |
|-----------------------------------------------------------|--------------------------------------------------------------|----------------------------------------------------------------------------------------|------------------------------------------------------------------------------------------------------------------------------------------|------|
| <i>SFTPC</i> Δexon<br>4                                   | Child with<br>respiratory<br>distress                        | Oral and intravenous<br>corticosteroids,<br>hydroxychloroquine,<br>supplemental oxygen | Some improvement in<br>respiratory status, still<br>continuous supplemental<br>oxygen requirement and<br>persistent respiratory distress | (25) |
| <i>SFTPC</i><br>p.E66K,<br>p.I73T,<br>p.V102M,<br>p.A155P | 8 Children<br>with<br>idiopathic<br>diffuse lung<br>diseases | 2 Children supplemental<br>oxygen, pulse steroids<br>and hydroxychloroquine            | Little effect, died                                                                                                                      | (26) |
|                                                           |                                                              | Supplemental oxygen,<br>pulse steroids,<br>hydroxychloroquine                          | Alive on oxygen, listed for<br>transplant                                                                                                |      |
|                                                           |                                                              | Supplemental oxygen,<br>hydroxychloroquine                                             | Alive on room air                                                                                                                        |      |
|                                                           |                                                              | Supplemental oxygen,<br>steroids,<br>hydroxychloroquine,<br>azithromycin               | Alive on room air                                                                                                                        |      |
|                                                           |                                                              | Supplemental oxygen,<br>pulse steroids,<br>hydroxychloroquine                          | Alive on oxygen                                                                                                                          |      |
|                                                           |                                                              | Supplemental oxygen,<br>pulse steroids,<br>bronchodilators,<br>antibiotics             | Alive on oxygen                                                                                                                          |      |
|                                                           |                                                              | Steroids, supplemental<br>oxygen                                                       | Alive on room air                                                                                                                        |      |
|                                                           |                                                              |                                                                                        |                                                                                                                                          |      |

|                                                 |                                                                          |                                                                          |                                                                                                                                           |      |
|-------------------------------------------------|--------------------------------------------------------------------------|--------------------------------------------------------------------------|-------------------------------------------------------------------------------------------------------------------------------------------|------|
| <i>SFTPC</i><br>p.L188Q                         | 2 Children<br>with<br>respiratory<br>distress<br>(NSIP- like<br>pattern) | Methylprednisolone and<br>hydroxychloroquine                             | No effect                                                                                                                                 | (27) |
| <i>SFTPC*</i>                                   | Child with<br>CPI                                                        | Corticosteroids,<br>hydroxychloroquine and<br>continuous oxygen          | Child gained weight,<br>discharged, later respiratory<br>function slowly and<br>progressively declined,<br>underwent lung transplantation | (28) |
| <i>SFTPC</i> p.I73T                             | Child with<br>NSIP/PAP                                                   | Supplemental oxygen,<br>antibiotics and oral<br>corticosteroids          | No effect, died                                                                                                                           | (29) |
| <i>SFTPC</i> p.I73T                             | Child with<br>PAP/ILD                                                    | Whole lung lavages,<br>systemic corticosteroids<br>and azathioprine      | Restored gas exchange and<br>growth velocity, normal<br>psychomotor development.                                                          | (30) |
| <i>SFTPC</i><br>p.G182R,<br>p.L188Q,<br>p.C189W | 1 Child with<br>PAP/NSIP                                                 | Clearance, steroids,<br>hydroxychloroquine,<br>mechanical ventilation    | Initially could not be weaned of<br>mechanical ventilation, age of<br>6 decannulated                                                      | (31) |
|                                                 | 1 Child with<br>respiratory<br>failure                                   | Clearance, steroids,<br>azathioprine, mechanical<br>ventilation          | Age of 5 successfully<br>decanulated                                                                                                      |      |
|                                                 | 1 Child with<br>respiratory<br>failure                                   | Steroids, azithromycin,<br>hydroxychloroquine,<br>mechanical ventilation | Decannulated age of 3, no<br>pulmonary-related<br>hospitalizations anymore                                                                |      |



|                                                            |                                                                |                                                                        |                                                                                                 |      |
|------------------------------------------------------------|----------------------------------------------------------------|------------------------------------------------------------------------|-------------------------------------------------------------------------------------------------|------|
| <i>SFTPC</i><br>p.L81V                                     | Child with<br>surfactant<br>protein C<br>deficiency            | Hydroxychloroquine,<br>oxygen therapy                                  | Respiratory improvement,<br>stable with minimal symptoms                                        | (32) |
| <i>SFTPC*</i>                                              | Child with<br>NSIP                                             | Systemic steroids,<br>azathioprine,<br>hydroxychloroquine              | Good response                                                                                   | (33) |
| Different<br><i>SFTPC</i><br>mutations                     | 15 Children<br>with<br>interstitial<br>chronic lung<br>disease | All methylprednisolone<br>5/15 Azithromycin<br>8/15 Hydroxychloroquine | All alive, 11 patients still<br>symptomatic with cough,<br>dyspnea, or exercise<br>intolerance. | (34) |
| Paediatric case reports/series with <i>ABCA3</i> mutations |                                                                |                                                                        |                                                                                                 |      |
| <i>ABCA3*/SFT<br/>PC</i>                                   | Child with<br>DPLD/surfact<br>ant<br>dysfunction               | Surfactant                                                             | Good                                                                                            | (33) |
|                                                            |                                                                | Systemic steroids                                                      | None, later on died                                                                             |      |
| <i>ABCA3*</i>                                              | Child with<br>CPI                                              | Systemic steroids,<br>Surfactant                                       | Good,                                                                                           |      |
|                                                            |                                                                | Chloroquine                                                            | None, later on died                                                                             |      |
|                                                            | Child with<br>DIP                                              | Systemic steroids,<br>hydroxychloroquine                               | None, later on died                                                                             |      |
| <i>ABCA3</i><br>c.358_359del                               | Child with<br><i>ABCA3</i><br>deficiency                       | Methylprednisolone,<br>oxygen therapy                                  | Minimal improvement, died<br>from progressive respiratory<br>failure                            | (32) |

|                                     |                                       |                                                                                                      |                                                                                    |      |
|-------------------------------------|---------------------------------------|------------------------------------------------------------------------------------------------------|------------------------------------------------------------------------------------|------|
| ABCA3<br>p.W1148X<br>and p.T1114A   | Child with<br>PAP-like<br>features    | Methylprednisolone,<br>antibiotics, antivirals and<br>antifungals, oxygen,<br>mechanical ventilation | Ineffective, no improvement in<br>respiratory function and chest<br>X-ray findings | (35) |
|                                     |                                       | BAL with bovine<br>surfactant                                                                        | Improved radiographic findings                                                     |      |
|                                     |                                       | Hydroxychloroquine                                                                                   | Decreased oxygen<br>administration                                                 |      |
| ABCA3<br>p.G964D                    | Child with<br>(possible)<br>IPF       | Prednisone and<br>macrolides                                                                         | Stable condition                                                                   | (3)  |
| ABCA3<br>p.A307V                    | Child with<br>respiratory<br>distress | Dexamethasone and<br>surfactant, CPAP                                                                | Some effect, no CPAP<br>required, later reduced effect<br>again CPAP required      | (36) |
|                                     |                                       | Methylprednisolone,<br>azithromycin,<br>hydroxychloroquine                                           | No CPAP required, only nasal<br>cannula                                            |      |
| ABCA3<br>p.Y1515X                   | Child with<br>RDS                     | Pulse steroids, antibiotics                                                                          | No improvement, died                                                               | (37) |
| ABCA3<br>p.R194G and<br>V1615GfsX15 | 2 Children<br>with IRDS               | CPAP, corticosteroids and<br>hydroxychloroquine                                                      | Little effect, died                                                                | (38) |
| ABCA3<br>p.D253H                    | Child with<br>DPLD                    | Methylprednisolone, oral<br>prednisone, oxygen<br>therapy                                            | No improvement                                                                     | (39) |

|                                              |                                                             |                                                                                |                                                                                                        |      |
|----------------------------------------------|-------------------------------------------------------------|--------------------------------------------------------------------------------|--------------------------------------------------------------------------------------------------------|------|
|                                              |                                                             | Azithromycin                                                                   | No steroids required, weaned off oxygen                                                                |      |
| ABCA3<br>p.R280C and<br>p.E690G              | Child with<br>DIP                                           | Oxygen supplementation,<br>surfactant therapy,<br>corticosteroids              | No improvement                                                                                         | (40) |
|                                              |                                                             | Hydroxychloroquine                                                             | Improvement FEV1                                                                                       |      |
| ABCA3<br>p.D507del CA<br>Ter 508,<br>p.D696N | Child with<br>DIP                                           | Dexamethasone,<br>supplemental oxygen,<br>surfactant therapy                   | Some improvement, later<br>further deterioration by<br>lowering dose dexamethasone                     | (41) |
|                                              |                                                             | Methylprednisolone,<br>azithromycin,<br>hydroxychloroquine                     | Slow, but notable<br>improvement, still oxygen<br>requirement, remained<br>tachypneic                  |      |
| ABCA3<br>p.K914R,<br>p.L1238_E12<br>39insGG  | Child with<br>ILD                                           | Methylprednisolone,<br>antibiotics                                             | Only transient and very limited<br>effects                                                             | (42) |
|                                              |                                                             | + Hydroxychloroquine                                                           | Reduced oxygen and<br>corticosteroids required.<br>Improvement on radiological<br>and clinical aspects |      |
| ABCA3<br>c.59G>T and<br>c.2646_2647i<br>nsC  | Child with<br>severe<br>respiratory<br>distress<br>syndrome | Home ventilator,<br>methylprednisolone,<br>hydroxychloroquine,<br>azithromycin | Respiratory mechanics and<br>gas exchange noticeably<br>improved, less hypercapnia                     | (43) |
| ABCA3<br>p.H778R,<br>p.L1252P                | Child with<br>DIP like<br>pattern                           | Methylprednisolone,<br>prednisone and                                          | Respiratory symptoms<br>completely disappeared ,<br>complete resolution of ground                      | (44) |

|                                                   |                                                                       |                                                                                                                  |                                                                                                                                                                            |      |
|---------------------------------------------------|-----------------------------------------------------------------------|------------------------------------------------------------------------------------------------------------------|----------------------------------------------------------------------------------------------------------------------------------------------------------------------------|------|
|                                                   |                                                                       | hydroxychloroquine,<br>clarithromycin                                                                            | glass opacities, improved lung<br>function                                                                                                                                 |      |
| Different<br><i>ABCA3</i><br>mutations            | 9 Children<br>with PAP<br>pattern, DIP<br>pattern and<br>NSIP pattern | All corticosteroids, 7/9<br>Hydroxychloroquine                                                                   | 1 died, 3 transplanted – 2 died<br>5 without transplantation, 3/5<br>improvement of hypoxaemia,<br>2/5 no improvement<br>4/5 stable lung function<br>1/5 slow decline FEV1 | (45) |
| <i>ABCA3</i><br>p.L798P<br>p.R1612P               | Child with<br>DIP                                                     | Antibiotics, supplemental<br>oxygen, exogenous<br>surfactant,<br>methylprednisolone,<br>hydroxychloroquine       | No clinical improvement,<br>increased oxygen requirement                                                                                                                   | (46) |
| <i>ABCA3</i><br>p.R1561Stop                       | Child with<br>respiratory<br>distress with<br>cyanosis                | Antibiotics, surfactant,<br>dexamethasone, inhaled<br>nitric oxide,<br>methylprednisolone,<br>hydroxychloroquine | Short term improvement of<br>respiration, increasing reticular<br>pattern on HRCT, later<br>increased hypoxemia                                                            | (47) |
| <i>ABCA3</i> large<br>deletion exon<br>2-5        | Child with<br>IRDS                                                    | N-CPAP, surfactant<br>therapy, dexamethasone                                                                     | No effect, died of respiratory<br>failure                                                                                                                                  | (48) |
| <i>ABCA3</i><br>$\Delta$ F1203 and<br>c.1375ins15 | Child with<br>IRDS                                                    | Supplemental oxygen and<br>systemic corticosteroids<br>and diuretics                                             | No effect, died                                                                                                                                                            | (49) |
| <i>ABCA3</i><br>p.R20L and<br>c.4483del25         | Child with<br>ILD                                                     | Prednisolone and<br>supplemental oxygen                                                                          | No improvement, patient died                                                                                                                                               | (50) |

|                                   |                                                                                |                                                                                                                      |                                                                                                         |      |
|-----------------------------------|--------------------------------------------------------------------------------|----------------------------------------------------------------------------------------------------------------------|---------------------------------------------------------------------------------------------------------|------|
| ABCA3<br>heterozygous<br>p.E292V  | Child with<br>cerebropulmo<br>nary<br>dysgenetic<br>syndrome                   | CPAP, mechanical<br>ventilation and antibiotics                                                                      | Worsening of disease, died                                                                              | (51) |
| ABCA3<br>p.S1116F                 | Child with<br>RDS                                                              | Supplemental oxygen,<br>mechanical ventilation,<br>exogenous surfactant,<br>antibiotics, and inhaled<br>nitric oxide | Despite treatment high oxygen<br>and mechanical ventilation<br>required, died of respiratory<br>failure | (52) |
| ABCA3<br>mutation                 | 19<br>Children###<br>(14 RDS, 4<br>RDS/PAP, 1<br>PAP)                          | 16/19 Surfactant                                                                                                     | 7 No effect, 9 moderate<br>improvement                                                                  | (4)  |
|                                   |                                                                                | 19/19 Systemic steroids                                                                                              | 14 No effect, 4 moderate<br>improvement, 1 good<br>improvement                                          |      |
|                                   |                                                                                | 9/19Hydroxychloroquine                                                                                               | 5 No effect, 3 moderate<br>improvement, 1 good<br>improvement                                           |      |
|                                   |                                                                                | 2/19 Azithromycin                                                                                                    | 2 No effect                                                                                             |      |
| Heterozygous<br>ABCA3<br>mutation | 16<br>children#### (9<br>with RDS, 4<br>with<br>RDS/PAP, 1<br>PAP, 2<br>chILD) | 12/16 Surfactant                                                                                                     | 8 No effect, 4 moderate,<br>transient improvement                                                       |      |
|                                   |                                                                                | 12/16 Systemic steroids                                                                                              | 8 No effect, 3 moderate,<br>transient improvement, 1 good<br>improvement                                |      |
|                                   |                                                                                | 8 /16Hydroxychloroquine                                                                                              | 3 No effect, 3 moderate,<br>transient improvement, 2 good<br>improvement                                |      |

|                                                                                                                                                                                            |                             |                                                                     |                                                                                                                                                                                                 |      |
|--------------------------------------------------------------------------------------------------------------------------------------------------------------------------------------------|-----------------------------|---------------------------------------------------------------------|-------------------------------------------------------------------------------------------------------------------------------------------------------------------------------------------------|------|
| ABCA3<br>p.M1227R<br>and<br>Ins1510fs/ter1<br>519                                                                                                                                          | Child with<br><br>DIP       | Macrolides,<br><br>dexamethasone,<br><br>mechanical ventilation     | no effect                                                                                                                                                                                       | (53) |
|                                                                                                                                                                                            |                             | Surfactant                                                          | Transient effect                                                                                                                                                                                |      |
| ABCA3<br>Heterozygous<br>R288K (7<br>patients)<br>R288K,<br>P766S<br>(heterozygou<br>s, 1 patient),<br>R288K,<br>S693L<br>(heterozygou<br>s, 1 patient),<br>R288K,<br>Q215K (1<br>patient) | 11 Children<br><br>with ILD | 5 Prednisolone,<br><br>surfactant, oxygen or<br><br>corticosteroids | Dead                                                                                                                                                                                            | (54) |
|                                                                                                                                                                                            |                             |                                                                     | 6 Oxygen, aspirin,<br><br>surfactant,<br><br>dexamethasone,<br><br>montelukast, salbutamol,<br><br>steroids,<br><br>hydroxychloroquine,<br><br>azathioprine, azithromycin<br><br>or antibiotics |      |
| Paediatric case report with <i>AP3B1</i> mutation                                                                                                                                          |                             |                                                                     |                                                                                                                                                                                                 |      |
| AP3B1<br>p.R509X and<br>p.E659X                                                                                                                                                            | Child with<br><br>HPS2      | Oxygen, systemic<br><br>corticosteroids, G-CSF                      | Clinically stable PF, age 14<br><br>dyspnoea on mild exertion                                                                                                                                   | (55) |
| Clinical trials                                                                                                                                                                            |                             |                                                                     |                                                                                                                                                                                                 |      |

|                   |                       |                                            |                                                                                                                                                                                                                                            |      |
|-------------------|-----------------------|--------------------------------------------|--------------------------------------------------------------------------------------------------------------------------------------------------------------------------------------------------------------------------------------------|------|
| <i>HPS1</i> †     | 21 Adults<br>with HPS | 11 treated with<br>pirfenidone 10 placebo  | Pirfenidone superior to<br>placebo: $\Delta$ FVC of<br>0.46%/month (p=0.587)<br><br>Restricted group including only<br>patients with initial FVC values<br>>50% of predicted: difference<br>in pulmonary function:<br>~0.7%/month (p=0.02) | (56) |
| <i>HPS1</i> or 4‡ | 35 Adults<br>with HPS | 23 treated with<br>pirfenidone, 12 placebo | No statistically significant<br>difference in lung function                                                                                                                                                                                | (57) |

HP: hypersensitivity pneumonitis; PF: pulmonary fibrosis; CPFE: combined pulmonary fibrosis and emphysema; HPS: Hermansky Pudlak syndrome; DIP: desquamative interstitial pneumonia; NSIP: nonspecific interstitial pneumonia; ILD: interstitial lung disease; PAP: pulmonary alveolar proteinosis; CPI: chronic pneumonitis of infancy; IRDS: infant respiratory distress syndrome; ARDS: Acute respiratory distress syndrome; chILD: childhood interstitial lung disease; BAL: bronchoalveolar lavage; (N-) CPAP: (Nasal-) continuous positive airway pressure;

ABCA3 mutations were compound heterozygous or homozygous mutations, unless otherwise stated

\*specific mutation not mentioned in the article, diagnosis based on absence of dense bodies platelets under electron microscopy or genetic testing

# case also reported in (3)

## 1 case also reported in (24)

### 1 case also reported in (3)

#### 1 case also reported in (46)

† 20 of these patients were Puerto Ricans homozygous for a 16-bp duplication in exon 15 of the *HPS1* gene, which leads to a frameshift. The other patient was a Puerto Rican with a 3904-bp deletion in the *HPS3* gene

‡ 33 of these patients were Puerto Ricans homozygous for the known 16-bp duplication in exon 15 of the *HPS1* gene. Two patients were non-Puerto Ricans, and the mutations in these patients are not reported

## References:

- (1) Cottin V, Reix P, Khouatra C, Thivolet-Bejui F, Feldmann D, Cordier JF. Combined pulmonary fibrosis and emphysema syndrome associated with familial SFTPC mutation. *Thorax* 2011 Oct;66(10):918-919.
- (2) Wang Y, Kuan PJ, Xing C, Cronkhite JT, Torres F, Rosenblatt RL, et al. Genetic Defects in Surfactant Protein A2 Are Associated with Pulmonary Fibrosis and Lung Cancer. *Am J Hum Genet* 2009 2009/01;84(1):52-59.
- (3) Campo I, Zorzetto M, Mariani F, Kadija Z, Morbini P, Dore R, et al. A large kindred of pulmonary fibrosis associated with a novel ABCA3 gene variant. *Respir Res* 2014 2014/04;15(1).
- (4) Kroner C, Wittmann T, Reu S, Teusch V, Klemme M, Rauch D, et al. Lung disease caused by ABCA3 mutations *Thorax* 2017 Mar;72(3):213-220.
- (5) Takahashi A, Yokoyama T. Hermansky-Pudlak syndrome with special reference to lysosomal dysfunction. A case report and review of the literature. *Virchows Arch A Pathol Anat Histopathol* 1984;402(3):247-258.
- (6) Furuhashi K, Enomoto N, Fujisawa T, Hashimoto D, Inui N, Nakamura Y, et al. Hermansky-Pudlak syndrome with nonspecific interstitial pneumonia. *Intern Med* 2014 /;53(5):449-453.
- (7) Sakata Y, Kawamura K, Ichikado K, Suga M, Yoshioka M. Hermansky-Pudlak syndrome type 4 with interstitial pneumonia. *Respir Med Case Rep* 2013 /;9(1):38-41.
- (8) Kanazu M, Arai T, Sugimoto C, Kitaichi M, Akira M, Abe Y, et al. An intractable case of hermansky-pudlak syndrome. *Intern Med* 2014 2014/;53(22):2629-2634.
- (9) Liza AF, Aziah AM. Albinism and lung fibrosis in a young man - the first case of adult Hermansky-Pudlak Syndrome reported in Malaysia. *Med J Malays* 2012 /;67(6):620-621.
- (10) Bachli EB, Brack T, Eppler E, Stallmach T, Trueb RM, Huizing M, et al. Hermansky-Pudlak syndrome type 4 in a patient from Sri Lanka with pulmonary fibrosis. *Am J Med Genet A* 2004 Jun 1;127A(2):201-207.
- (11) Gruson L, Berk T. A case of hermansky-pudlak syndrome with pulmonary sarcoidosis. *J Clin Aesthet Dermatol* 2009 Oct;2(10):41-44.
- (12) Ideno S, Hatori E, Takeda J, Morisaki H. Anesthetic management of a patient with Hermansky-Pudlak syndrome undergoing video-assisted bullectomy. *J Clin Anesth* 2015 2015/05;27(3):243-246.
- (13) Avital A, Hevroni A, Godfrey S, Cohen S, Maayan C, Nusair S, et al. Natural history of five children with surfactant protein C mutations and interstitial lung disease. *Pediatr Pulmonol* 2014 Nov;49(11):1097-1105.
- (14) Rosen DM, Waltz DA. Hydroxychloroquine and surfactant protein C deficiency. *N Engl J Med* 2005 Jan 13;352(2):207-208.
- (15) Noguee LM, Dunbar AE, Wert SE, Askin F, Hamvas A, Whitsett JA. A mutation in the surfactant protein C gene associated with familial interstitial lung disease. *New Engl J Med* 2001 2001/02;344(8):573-579.
- (16) Abou Taam R, Jaubert F, Emond S, Le Bourgeois M, Epaud R, Karila C, et al. Familial interstitial disease with I73T mutation: A mid- and long-term study. *Pediatr Pulmonol* 2009 Feb;44(2):167-175.



- (17) Kröner C, Reu S, Teusch V, Schams A, Grimmelt A-, Barker M, et al. Genotype alone does not predict the clinical course of SFTPC deficiency in paediatric patients. *Eur Respir J* 2015 2015/07;46(1):197-206.
- (18) Thouvenin G, Taam RA, Flamein F, Guillot L, Bourgeois ML, Reix P, et al. Characteristics of disorders associated with genetic mutations of surfactant protein C. *Arch Dis Child* 2010 /;95(6):449-454.
- (19) Arikan-Ayyildiz Z, Caglayan-Sozmen S, Isik S, Deterding R, Dishop MK, Couderc R, et al. Survival of an infant with homozygous surfactant protein C (SFTPC) mutation. *Pediatr Pulmonol* 2014 /;49(3):E112; E115.
- (20) Hevroni A, Goldman A, Springer C. Infant pulmonary function testing in chronic pneumonitis of infancy due to surfactant protein C mutation. *Pediatr Pulmonol* 2015 2015/06;50(6):E17-E23.
- (21) Sismanlar T, Aslan AT, Griesse M. Life-threatening, giant pneumatoceles in the course of surfactant protein C deficiency. *Pediatr Pulmonol* 2015 2015/07;50(7):E25-E28.
- (22) Salerno T, Peca D, Menchini L, Schiavino A, Boldrini R, Esposito F, et al. Surfactant Protein C-associated interstitial lung disease; Three different phenotypes of the same SFTPC mutation. *Ital J Pediatr* 2016 2016/02;42(1).
- (23) Banac S, Dessardo S, Lah-Tomulić K, Frleta N, Sindičić-Dessardo N, Šaina G, et al. Lethal respiratory failure due to a surfactant protein C gene mutation. *Signa Vitae* 2012 2012/;7(2):47-49.
- (24) Brasch F, Griesse M, Tredano M, Johnen G, Ochs M, Rieger C, et al. Interstitial lung disease in a baby with a de novo mutation in the SFTPC gene. *Eur Respir J* 2004 Jul;24(1):30-39.
- (25) Henderson LB, Melton K, Wert S, Couriel J, Bush A, Ashworth M, et al. Large ABCA3 and SFTPC deletions resulting in lung disease. *Annals Am Thorac Soc* 2013 /;10(6):602-607.
- (26) Peca D, Boldrini R, Johansson J, Shieh JT, Citti A, Petrini S, et al. Clinical and ultrastructural spectrum of diffuse lung disease associated with surfactant protein C mutations. *Eur J Hum Genet* 2015 2015/08;23(8):1033-1041.
- (27) Chibbar R, Shih F, Baga M, Torlakovic E, Ramlall K, Skomro R, et al. Nonspecific interstitial pneumonia and usual interstitial pneumonia with mutation in surfactant protein C in familial pulmonary fibrosis. *Mod Pathol* 2004 /;17(8):973-980.
- (28) Hime NJ, Fitzgerald D, Robinson P, Selvadurai H, Van Asperen P, Jaffe A, et al. Childhood interstitial lung disease due to surfactant protein C deficiency: frequent use and costs of hospital services for a single case in Australia. *Orphanet J Rare Dis* 2014 Mar 19;9:36-1172-9-36.
- (29) Percopo S, Cameron HS, Nogee LM, Pettinato G, Montella S, Santamaria F. Variable phenotype associated with SP-C gene mutations: fatal case with the I73T mutation. *Eur Respir J* 2004 Dec;24(6):1072-1073.
- (30) Tredano M, Griesse M, Brasch F, Schumacher S, De Blic J, Marque S, et al. Mutation of SFTPC in Infantile Pulmonary Alveolar Proteinosis with or without Fibrosing Lung Disease. *Am J Med Genet* 2004 2004/04;126 A(1):18-26.
- (31) Liptzin DR, Patel T, Deterding RR. Chronic ventilation in infants with surfactant protein C mutations: An alternative to lung transplantation. *Am J Respir Crit Care Med* 2015 2015/06;191(11):1338-1340.
- (32) Hines EJ, Walsh M, Armes JE, Douglas T, Chawla J. Interstitial lung disease in infancy: A general approach. *J Paediatr Child Health* 2016 2016/04;52(4):370-376.

- (33) Griese M, Haug M, Brasch F, Freiherst A, Lohse P, Von Kries R, et al. Incidence and classification of pediatric diffuse parenchymal lung diseases in Germany. *Orphanet J Rare Dis* 2009;4(1).
- (34) Mechri M, Epaud R, Emond S, Coulomb A, Jaubert F, Tarrant A, et al. Surfactant protein C gene (SFTPC) mutation-associated lung disease: high-resolution computed tomography (HRCT) findings and its relation to histological analysis. *Pediatr Pulmonol* 2010 ;45(10):1021-1029.
- (35) Yokota T, Matsumura Y, Ban N, Matsubayashi T, Inagaki N. Heterozygous ABCA3 mutation associated with non-fatal evolution of respiratory distress. *Eur J Pediatr* 2008 Jun;167(6):691-693.
- (36) Tan JK, Murray C, Schultz A. ABCA3 lung disease in an ex 27 week preterm infant responsive to systemic glucocorticosteroids *Pediatr Pulmonol* 2016 Jan;51(1):E1-3.
- (37) Mukhtar GMA, Al Otaibi WH, Al-Mobaireek KFA, Al-Saleh S. Adenosine triphosphate-binding cassette member A3 gene mutation in children from one family from Saudi Arabia. *Ann Thorac Med* 2016 2016/07;11(3):227-229.
- (38) Piersigilli F, Peca D, Campi F, Corsello M, Landolfo F, Boldrini R, et al. New ATP-binding cassette A3 mutation causing surfactant metabolism dysfunction pulmonary type 3. *Pediatr Int* 2015 2015/10;57(5):970-974.
- (39) Thouvenin G, Nathan N, Epaud R, Clement A. Diffuse parenchymal lung disease caused by surfactant deficiency: dramatic improvement by azithromycin. *BMJ Case Rep* 2013 Jun 24;2013:10.1136/bcr-2013-009988.
- (40) Williamson M, Wallis C. Ten-year follow up of hydroxychloroquine treatment for ABCA3 deficiency. *Pediatr Pulmonol* 2014 ;49(3):299-301.
- (41) Hallik M, Annilo T, Ilmoja ML. Different course of lung disease in two siblings with novel ABCA3 mutations. *Eur J Pediatr* 2014 Dec;173(12):1553-1556.
- (42) Kitazawa H, Moriya K, Niizuma H, Kawano K, Saito-Nanjo Y, Uchiyama T, et al. Interstitial lung disease in two brothers with novel compound heterozygous ABCA3 mutations. *Eur J Pediatr* 2013 ;172(7):953-957.
- (43) Hayes D,Jr, Lloyd EA, Fitch JA, Bush A. ABCA3 transporter deficiency. *Am J Respir Crit Care Med* 2012 Oct 15;186(8):807.
- (44) Thavagnanam S, Cutz E, Manson D, Nogee LM, Dell SD. Variable clinical outcome of ABCA3 deficiency in two siblings. *Pediatr Pulmonol* 2013 Oct;48(10):1035-1038.
- (45) Doan ML, Guillerman RP, Dishop MK, Nogee LM, Langston C, Mallory GB, et al. Clinical, radiological and pathological features of ABCA3 mutations in children. *Thorax* 2008 ;63(4):366-373.
- (46) Goncalves JP, Pinheiro L, Costa M, Silva A, Goncalves A, Pereira A. Novel ABCA3 mutations as a cause of respiratory distress in a term newborn. *Gene* 2014 Jan 25;534(2):417-420.
- (47) Winter J, Essmann S, Kieszun A, Aslanidis C, Griese M, Poplawska K, et al. Neonatal respiratory insufficiency caused by an (homozygous) ABCA3-stop mutation: A systematic evaluation of therapeutic options. *Klin Padiatr* 2014 ;226(2):53-58.
- (48) Carrera P, Ferrari M, Presi S, Ventura L, Vergani B, Lucchini V, et al. Null ABCA3 in humans: large homozygous ABCA3 deletion, correlation to clinical-pathological findings. *Pediatr Pulmonol* 2014 Mar;49(3):E116-20.

- (49) Uchida DA, Wert SE, Noguee LM, Carroll TR, Chatfield BA. Pulmonary nodules in a newborn with ATP-binding cassette transporter A3 (ABCA3) mutations. *Pediatrics* 2011 /;127(5):e1347; e1351.
- (50) Prestridge A, Wooldridge J, Deutsch G, Young LR, Wert SE, Whitsett JA, et al. Persistent tachypnea and hypoxia in a 3-month-old term infant. *J Pediatr* 2006 Nov;149(5):702-706.
- (51) Shanklin DR, Mullins AC, Baldwin HS. Cerebropulmonary dysgenetic syndrome. *Exp Mol Pathol* 2008 /;85(2):112-116.
- (52) Moore GP, Lines MA, Geraghty MT, De Nanassy J, Kovesi T. Novel mutation in ABCA3 resulting in fatal congenital surfactant deficiency in two siblings. *Am J Respir Crit Care Med* 2014 2014/03;189(6):750-752.
- (53) Maly J, Navratilova M, Hornychova H, Looman AC. Respiratory failure in a term newborn due to compound heterozygous ABCA3 mutation: the case report of another lethal variant *J Perinatol* 2014 Dec;34(12):951-953.
- (54) Wittmann T, Frixel S, Höppner S, Schindlbeck U, Schams A, Kappler M, et al. Increased risk of interstitial lung disease in children with a single R288K variant of ABCA3. *Mol Med* 2016 2016/;22:183-191.
- (55) Gochuico BR, Huizing M, Golas GA, Scher CD, Tsokos M, Denver SD, et al. Interstitial lung disease and pulmonary fibrosis in hermansky-pudlak syndrome type 2, an adaptor protein-3 complex disease. *Mol Med* 2012 /;18(1):56-64.
- (56) Gahl WA, Brantly M, Troendle J, Avila NA, Padua A, Montalvo C, et al. Effect of pirfenidone on the pulmonary fibrosis of Hermansky-Pudlak syndrome. *Mol Genet Metab* 2002 2002/;76(3):234-242.
- (57) O'Brien K, Troendle J, Gochuico BR, Markello TC, Salas J, Cardona H, et al. Pirfenidone for the treatment of Hermansky-Pudlak syndrome pulmonary fibrosis. *Mol Genet Metab* 2011 /;103(2):128-134.

### **Search strategy with three search items in Pub Med**

((("Idiopathic Interstitial Pneumonias"[Mesh] OR "Lung Diseases, Interstitial"[Mesh:NoExp] OR "Pulmonary Fibrosis"[Mesh] OR interstitial pneumon\*[tiab] OR interstitial lung diseas\*[tiab] OR pulmonary fibros\*[tiab] OR lung fibros\*[tiab] OR "Pneumocytes"[Mesh] OR pneumocyte\*[tiab] OR alveolar epithelial cell\*[tiab]) AND ("Pulmonary Surfactant-Associated Proteins"[Mesh] OR surfactant associated protein\*[tiab] OR lung-surfactant protein\*[tiab] OR SFTP\*[tiab] OR SP-C[tiab] OR SP-A[tiab] OR SPC[tiab] OR SPA[tiab] OR "Pulmonary Surfactant-Associated Protein C"[Mesh] OR "Pulmonary Surfactant-Associated Protein A"[Mesh] OR "ATP-Binding Cassette Transporters"[Mesh] OR ATP binding cassette transporter\*[tiab] OR ABC transporter\*[tiab] OR ABCA3[tiab] OR "Hermanski-Pudlak Syndrome"[Mesh] OR hermansky pudlak syndrom\*[tiab] OR hermanski pudlak syndrom\*[tiab] OR HPS[tiab] OR "HPS1 protein, human" [Supplementary Concept] OR "HPS4 protein, human" [Supplementary Concept] OR "Hps1 protein, rat" [Supplementary Concept] OR "Hps1 protein, mouse" [Supplementary Concept] OR "Hps4 protein, mouse" [Supplementary Concept]) AND ("Pharmaceutical Preparations"[Mesh] OR "Physiological Effects of Drugs"[Mesh] OR "Drug Therapy"[Mesh] OR "drug therapy" [Subheading] OR drug\*[tiab] OR therap\*[tiab] OR pharmaceutic\*[tiab] OR medication\*[tiab] OR treat\*[tiab] OR "drug effects" [Subheading] OR intervention\*[tiab]) AND (english[la]))

### **Search strategy with three search items in Embase**

('interstitial pneumonia'/exp OR 'interstitial lung disease'/de OR 'lung fibrosis'/exp OR  
 (interstitial NEXT/1 pneumon\*):ab,ti OR ("interstitial lung" NEXT/1 diseas\*):ab,ti OR  
 ((pulmonary OR lung) NEXT/1 fibros\*):ab,ti OR 'lung alveolus cell'/exp OR  
 pneumocyte\*:ab,ti OR ("alveolar epithelial" NEXT/1 cell\*):ab,ti) AND ('surfactant  
 associated protein'/exp OR (('surfactant associated' OR 'lung-surfactant') NEXT/1  
 protein\*):ab,ti OR SFTP\*:ab,ti OR 'SP-C':ab,ti OR 'SP-A':ab,ti OR SPC:ab,ti OR  
 SPA:ab,ti OR 'surfactant protein C'/exp OR 'surfactant protein A'/exp OR 'ABC  
 transporter'/exp OR (('ATP binding cassette' OR ABC) NEXT/1 transporter\*):ab,ti OR  
 ABCA3:ab,ti OR (('hermanky pudlak' OR 'hermanski pudlak') NEXT/1  
 syndrom\*):ab,ti OR HPS:ab,ti) AND ('pharmaceutics'/exp OR 'drug effect'/exp OR  
 'drug therapy'/exp OR 'drug therapy'/lnk OR 'pharmaceutics'/lnk OR drug\*:ab,ti OR  
 therap\*:ab,ti OR pharmaceutic\*:ab,ti OR medication\*:ab,ti OR treat\*:ab,ti OR  
 intervention\*:ab,ti) NOT 'conference abstract'/it AND [english]/lim

### **Search strategy with two search items Pubmed.**

((("Idiopathic Interstitial Pneumonias"[Mesh] OR "Lung Diseases, Interstitial"[Mesh:NoExp] OR "Pulmonary Fibrosis"[Mesh] OR interstitial pneumon\*[tiab] OR interstitial lung diseas\*[tiab] OR pulmonary fibros\*[tiab] OR lung fibros\*[tiab] OR "Pneumocytes"[Mesh] OR pneumocyte\*[tiab] OR alveolar epithelial cell\*[tiab]) AND ("Pulmonary Surfactant-Associated Proteins"[Mesh] OR surfactant associated protein\*[tiab] OR lung-surfactant protein\*[tiab] OR SFTP\*[tiab] OR SP-C[tiab] OR SP-A[tiab] OR SPC[tiab] OR SPA[tiab] OR "Pulmonary Surfactant-Associated Protein C"[Mesh] OR "Pulmonary Surfactant-Associated Protein A"[Mesh] OR "ATP-Binding Cassette Transporters"[Mesh] OR ATP binding cassette transporter\*[tiab] OR ABC transporter\*[tiab] OR ABCA3[tiab] OR "Hermanski-Pudlak Syndrome"[Mesh] OR hermansky pudlak syndrom\*[tiab] OR hermanski pudlak syndrom\*[tiab] OR HPS[tiab] OR "HPS1 protein, human" [Supplementary Concept] OR "HPS4 protein, human" [Supplementary Concept] OR "Hps1 protein, rat" [Supplementary Concept] OR "Hps1 protein, mouse" [Supplementary Concept] OR "Hps4 protein, mouse" [Supplementary Concept]) AND (english[la])) NOT (((("Idiopathic Interstitial Pneumonias"[Mesh] OR "Lung Diseases, Interstitial"[Mesh:NoExp] OR "Pulmonary Fibrosis"[Mesh] OR interstitial pneumon\*[tiab] OR interstitial lung diseas\*[tiab] OR pulmonary fibros\*[tiab] OR lung fibros\*[tiab] OR "Pneumocytes"[Mesh] OR pneumocyte\*[tiab] OR alveolar epithelial cell\*[tiab]) AND ("Pulmonary Surfactant-Associated Proteins"[Mesh] OR surfactant associated protein\*[tiab] OR lung-surfactant protein\*[tiab] OR SFTP\*[tiab] OR SP-C[tiab] OR SP-A[tiab] OR SPC[tiab] OR SPA[tiab] OR "Pulmonary Surfactant-Associated Protein C"[Mesh] OR "Pulmonary Surfactant-Associated Protein A"[Mesh] OR "ATP-Binding Cassette Transporters"[Mesh] OR ATP binding cassette

transporter\*[tiab] OR ABC transporter\*[tiab] OR ABCA3[tiab] OR "Hermanski-Pudlak Syndrome"[Mesh] OR hermansky pudlak syndrom\*[tiab] OR hermanski pudlak syndrom\*[tiab] OR HPS[tiab] OR "HPS1 protein, human" [Supplementary Concept] OR "HPS4 protein, human" [Supplementary Concept] OR "Hps1 protein, rat" [Supplementary Concept] OR "Hps1 protein, mouse" [Supplementary Concept] OR "Hps4 protein, mouse" [Supplementary Concept]) AND ("Pharmaceutical Preparations"[Mesh] OR "Physiological Effects of Drugs"[Mesh] OR "Drug Therapy"[Mesh] OR "drug therapy" [Subheading] OR drug\*[tiab] OR therap\*[tiab] OR pharmaceutic\*[tiab] OR medication\*[tiab] OR treat\*[tiab] OR "drug effects" [Subheading] OR intervention\*[tiab]) AND (english[la])

### **Search strategy with two search items Embase**

'interstitial pneumonia'/exp OR 'interstitial lung disease'/de OR 'lung fibrosis'/exp OR (interstitial NEXT/1 pneumon\*):ab,ti OR ('interstitial lung' NEXT/1 diseas\*):ab,ti OR ((pulmonary OR lung) NEXT/1 fibros\*):ab,ti OR 'lung alveolus cell'/exp OR pneumocyte\*:ab,ti OR ('alveolar epithelial' NEXT/1 cell\*):ab,ti AND ('surfactant associated protein'/exp OR (('surfactant associated' OR 'lung-surfactant') NEXT/1 protein\*):ab,ti OR sftp\*:ab,ti OR 'sp-c':ab,ti OR 'sp-a':ab,ti OR spc:ab,ti OR spa:ab,ti OR 'surfactant protein c'/exp OR 'surfactant protein a'/exp OR 'abc transporter'/exp OR (('atp binding cassette' OR abc) NEXT/1 transporter\*):ab,ti OR abca3:ab,ti OR (('hermansky pudlak' OR 'hermanski pudlak') NEXT/1 syndrom\*):ab,ti OR hps:ab,ti) NOT 'conference abstract'/it AND [english]/lim AND ('case report'/de OR 'clinical article'/de OR 'clinical trial'/de OR 'cohort analysis'/de OR 'comparative study'/de OR 'controlled study'/de OR 'human'/de OR 'human tissue'/de OR 'major clinical

study'/de OR 'retrospective study'/de) AND 'article'/it NOT ('interstitial pneumonia'/exp  
 OR 'interstitial lung disease'/de OR 'lung fibrosis'/exp OR  
 (interstitial NEXT/1 pneumon\*):ab,ti OR ('interstitial lung'NEXT/1 diseas\*):ab,ti OR  
 ((pulmonary OR lung) NEXT/1 fibros\*):ab,ti OR 'lung alveolus cell'/exp  
 OR pneumocyte\*:ab,ti OR ('alveolar epithelial' NEXT/1 cell\*):ab,ti AND ('surfactant  
 associated protein'/exp OR (('surfactant associated' OR 'lung-surfactant')  
 NEXT/1 protein\*):ab,ti OR sftp\*:ab,ti OR 'sp-c':ab,ti OR 'sp-a':ab,ti OR spc:ab,ti  
 OR spa:ab,ti OR 'surfactant protein c'/exp OR 'surfactant protein a'/exp OR 'abc  
 transporter'/exp OR (('atp binding cassette' OR abc) NEXT/1 transporter\*):ab,ti  
 OR abca3:ab,ti OR (('hermansky pudlak' OR 'hermanski pudlak')  
 NEXT/1 syndrom\*):ab,ti OR hps:ab,ti) AND ('pharmaceutics'/exp OR 'drug effect'/exp  
 OR 'drug therapy'/exp OR 'drug therapy'/lnk OR 'pharmaceutics'/lnk OR drug\*:ab,ti  
 OR therap\*:ab,ti OR pharmaceutic\*:ab,ti OR medication\*:ab,ti OR treat\*:ab,ti  
 OR intervention\*:ab,ti) NOT 'conference abstract'/it AND [english]/lim)

Include: antibody and cells used for ILD research

Exclude: siRNA/shRNA, overexpression gene, acute respiratory distress syndrome,  
 cell therapy, only ventilation/oxygen therapy, bronchoalveolar lavage or lung  
 transplantation
